# Supplementary material for: A growing threat to the ozone layer from short-lived anthropogenic chlorocarbons
Source: Copernicus journal article supplement (doi:10.5194/acp-17-11929-2017), 2017-10-12
Supplement: Supplementary file 1 [file acp-17-11929-2017-supplement.zip]

Archive with 4 entries (4 files):
- acp-17-11929-2017-supplement-title-page.pdf
- Feb2014.mp4
- acp-2017-497_supplement_v2.pdf
- Jan2014.mp4
