# Supplementary material for: A growing threat to the ozone layer from short-lived anthropogenic chlorocarbons
Source: Copernicus journal article supplement (doi:10.5194/acp-17-11929-2017), 2017-10-12
Supplement: Supplementary file 1 [file acp-17-11929-2017-supplement.zip › acp-17-11929-2017-supplement-title-page.pdf]

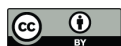

*Supplement of*

**A growing threat to the ozone layer from short-lived  
anthropogenic chlorocarbons**

**David E. Oram et al.**

*Correspondence to:* David E. Oram ([d.e.oram@uea.ac.uk](mailto:d.e.oram@uea.ac.uk))

- [acp-17-11929-2017-supplement-title-page.pdf](#)
- [Feb2014.mp4](#)
- [Jan2014.mp4](#)
- [acp-2017-497\\_supplement\\_v2.pdf](#)

The copyright of individual parts of the supplement might differ from the CC BY 3.0 License.
